# Supplementary material for: Viscous Cervical Environment-on-a-Chip for Selecting High-Quality Sperm from Human Semen
Source: MDPI journal article supplement (doi:10.3390/biomedicines9101439), 2021-10-10
Supplement: s1 [file s1]

**Table 1 Characteristic of raw semen analysis**

| <b>Patient</b> | <b>Sperm count<br/>(10<sup>4</sup>)</b> | <b>Sperm motility<br/>(%)</b> | <b>Progressive<br/>motility (%)</b> | <b>Volume<br/>(ml)</b> | <b>Debris<br/>(*class)</b> | <b>WBC<br/>(10<sup>6</sup>)</b> |
|----------------|-----------------------------------------|-------------------------------|-------------------------------------|------------------------|----------------------------|---------------------------------|
| <b>1</b>       | 155                                     | 44                            | 43                                  | 2.6                    | 1                          | 1.8                             |
| <b>2</b>       | 149                                     | 56                            | 55                                  | 2.3                    | 0                          | 0.2                             |
| <b>3</b>       | 56                                      | 42                            | 41                                  | 7.7                    | 2                          | 0.3                             |
| <b>4</b>       | 98                                      | 69                            | 68                                  | 7.6                    | 2                          | 0.1                             |
| <b>5</b>       | 54                                      | 43                            | 43                                  | 7.6                    | 2                          | 0.1                             |
| <b>6</b>       | 41                                      | 59                            | 58                                  | 7.7                    | 1                          | 0                               |
| <b>7</b>       | 102                                     | 40                            | 39                                  | 7.6                    | 1                          | 1                               |
| <b>8</b>       | 88                                      | 63                            | 59                                  | 7.7                    | 1                          | 0.1                             |
| <b>9</b>       | 80                                      | 66                            | 65                                  | 7.3                    | 1                          | 1                               |
| <b>10</b>      | 189                                     | 35                            | 34                                  | 3.8                    | 0                          | 0                               |

\*class: Qualitative classification of debris concentration, where '0' corresponds to very low concentration of debris, '1' to medium concentration, and '2' to relatively high concentration of debris.
